# Supplementary material
Source: PubMed Central journal article supplement (PMC5892434)
Supplement: NIHMS954101-supplement-Supplemental.pdf [file NIHMS954101-supplement-Supplemental.pdf]

**Supplemental Table 1: Primers Utilized in Study**

| Gene          | Forward Sequence                | Reverse Sequence               |
|---------------|---------------------------------|--------------------------------|
| <i>PRL</i>    | 5'- ACCCTGTCTGGTCGGGACTT -3'    | 5'- TGTTGTGGATGATTCGGCAC -3'   |
| <i>IGFBP1</i> | 5'- CCTGCCAAACTGCAACAAGA -3'    | 5'- TCCCATTCCAAGGGTAGACG -3'   |
| <i>RPL17</i>  | 5'- ACGAAAAGCCACGAAGTATCTG - 3' | 5'- GACCTTGTGTCCAGCCCCAT -3'   |
| <i>ESR1</i>   | 5'-CAACGGGACTTTCCAAAATGTCG-3'   | 5'-ATTGGATCCGAGACAGAATTTCCG-3' |
| <i>PGR</i>    | 5'-TGTATTTGTGCGTGTGGGTG-3'      | 5'-TACACGCCATTCCCAGGAAG-3'     |
| <i>CCNA2</i>  | 5'-CTGCATTTGGCTGTGAACTAC-3'     | 5'-ACAAACTCTGCTACTTCTGGG-3'    |
| <i>CCNB1</i>  | 5'-GGCTTTCTCTGATGTAATTCTTGC-3'  | 5'-GTATTTTGGTCTGACTGCTTGC-3'   |
| <i>CCND2</i>  | 5'-CCTCCAAACTCAAAGAGACCAG-3'    | 5'-TTCCACTTCAACTTCCCCAG-3'     |
| <i>CCNE1</i>  | 5'-TCTTGAGCAACACCCTCTTC-3'      | 5'-TTCTTGTGTCGCCATATACCG-3'    |
| <i>CDK4</i>   | 5'-AGTCCACATATGCAACACCTG-3'     | 5'-TGGTCGGCTTCAGAGTTTC-3'      |
| <i>CDKN1A</i> | 5'-CTCTCAGGGTCGAAAACGG-3'       | 5'-ATGTAGAGCGGGCCTTTG-3'       |
